# Supplementary material for: Critical Role of Al Pair Sites in Methane Oxidation to Methanol on Cu-Exchanged Mordenite Zeolites
Source: MDPI journal article supplement (doi:10.3390/catal11060751), 2021-06-19
Supplement: s1 [file s1]

Archive with 1 entries (1 files):
- catalysts-1261764-supplementary.pdf
